# Supplementary material
Source: publisher figshare collection journal article supplement (https://springernature.figshare.com/ndownloader/files/22658294)
Supplement: Supplementary file 1 [file 22658294]

## Sheet: Sheet1
Figure/table/supplementary file supported by the dataset	Dataset name	Dataset format	Persistent link to the raw data
figure 1	sample_annotations_370samples.RData	.Rdata
figure 2a and b	sample_annotations_370samples.RData	.Rdata
figure 2c	copy_number_logr_1835049probes338samples.Rdata	.Rdata	https://identifiers.org/ega.dataset:EGAD00010000942, https://identifiers.org/ega.dataset:EGAD00010001863
figure 2d	gene_expression_collapsed_to_gene_19518genes370samples.RData	.Rdata	https://identifiers.org/geo:GSE80999, https://identifiers.org/geo:GSE59248, https://identifiers.org/ega.dataset:EGAD00010001864
figure 3	sample_annotations_370samples.RData	.Rdata
figure 4a	methylation_pca_signatures_19411genes314samples.Rdata	.Rdata	https://identifiers.org/geo:GSE60185, https://identifiers.org/ega.dataset:EGAD00010001865
figure 4b and c	methylation_beta_values_436225probes314samples.Rdata	.Rdata	https://identifiers.org/geo:GSE60185, https://identifiers.org/ega.dataset:EGAD00010001865
supplementary figure 1a	sample_annotations_370samples.RData	.Rdata
supplementary figure 1b	gene_expression_collapsed_to_gene_19518genes370samples.RData	.Rdata	https://identifiers.org/geo:GSE80999, https://identifiers.org/geo:GSE59248, https://identifiers.org/ega.dataset:EGAD00010001864
supplementary figure 2 a and b	gene_expression_collapsed_to_gene_19518genes370samples.RData	.Rdata	https://identifiers.org/geo:GSE80999, https://identifiers.org/geo:GSE59248, https://identifiers.org/ega.dataset:EGAD00010001864
supplementary figure 3 a-f	sample_annotations_370samples.RData	.Rdata
supplementary figure 4	copy_number_logr_1835049probes338samples.Rdata	.Rdata	https://identifiers.org/ega.dataset:EGAD00010000942, https://identifiers.org/ega.dataset:EGAD00010001863
supplementary figure 5	sample_annotations_370samples.RData	.Rdata
supplementary figure 6	copy_number_logr_collapsed_to_gene_20222genes338samples.Rdata; methylation_pca_signatures_19411genes314samples.Rdata; gene_expression_collapsed_to_gene_19518genes370samples.Rdata	.Rdata	https://identifiers.org/geo:GSE80999, https://identifiers.org/geo:GSE59248, https://identifiers.org/geo:GSE60185, https://identifiers.org/ega.dataset:EGAD00010000942, https://identifiers.org/ega.dataset:EGAD00010001863, https://identifiers.org/ega.dataset:EGAD00010001864, https://identifiers.org/ega.dataset:EGAD00010001865
table 1	sample_annotations_370samples.RData	.Rdata
table 2	sample_annotations_370samples.RData	.Rdata
supplementary file 1	sample_annotations_370samples.RData	.Rdata
supplementary file 2	methylation_pca_signatures_19411genes314samples.Rdata	.Rdata	https://identifiers.org/geo:GSE60185, https://identifiers.org/ega.dataset:EGAD00010001865
Note: The processed .Rdata files will be made available on request as described in the Data access section
